# Supplementary material for: Descriptors of Sepsis Using the Sepsis-3 Criteria: A Cohort Study in Critical Care Units Within the U.K. National Institute for Health Research Critical Care Health Informatics Collaborative*
Source: PubMed Central journal article supplement (PMC8508729; doi:10.1097/ccm.0000000000005169), 2021-07-01
Supplement: ccm-49-1883-s002.pdf [file ccm-49-1883-s002.pdf]

## Supplemental Digital Content 2

**sTable 1**

Characteristics of National Health Service intensive care units included in this study

| <b>NHS Trust</b>                                                 | <b>University College London Hospitals</b> | <b>Guy's and St Thomas'</b> | <b>Cambridge University Hospitals</b> | <b>Imperial College Healthcare</b> | <b>Overall</b> |
|------------------------------------------------------------------|--------------------------------------------|-----------------------------|---------------------------------------|------------------------------------|----------------|
| Start date of contribution                                       | February 2014                              | February 2014               | August 2015                           | February 2014                      | February 2014  |
| End date of contribution                                         | April 2018                                 | July 2017                   | April 2018                            | January 2017                       | December 2018  |
| Number of admissions while unit was submitting satisfactory data | 8,289                                      | 13,326                      | 4,667                                 | 2,504                              | 28,786         |
| Number of admissions included in study                           | 8,246                                      | 13,139                      | 4,594                                 | 2,477                              | 28,456         |
| Number of patients included in study                             | 7,070                                      | 11,023                      | 4,152                                 | 2,294                              | 24,539         |
| <b>N (%) of ICU admissions by admission category</b>             |                                            |                             |                                       |                                    |                |
| Elective surgical                                                | 3,176 (38.5%)                              | 5,184 (39.5%)               | 660 (14.4%)                           | 519 (21.0%)                        | 9,539 (33.5%)  |
| Emergency surgical                                               | 1,798 (21.8%)                              | 1,410 (10.7%)               | 872 (19.0%)                           | 505 (20.4%)                        | 4,585 (16.1%)  |
| Emergency medical                                                | 3,272 (39.7%)                              | 6,545 (49.8%)               | 3,062 (66.7%)                         | 1,453 (58.7%)                      | 14,332 (50.4%) |
| N (%) of ICU admissions with sepsis                              | 2,672 (32.4%)                              | 4,907 (37.3%)               | 2,466 (53.7%)                         | 1,273 (51.4%)                      | 11,318 (39.8%) |
| N (%) of ICU admissions coded as infection in ICNARC data        | 1,498 (18.2%)                              | 2,888 (22.0%)               | 862 (18.8%)                           | 568 (22.9%)                        | 5,816 (20.4%)  |
| N (%) of sepsis admissions coded as infection in ICNARC data     | 1,068 (40.0%)                              | 2,316 (47.2%)               | 723 (29.3%)                           | 436 (34.2%)                        | 4,543 (40.1%)  |
| ICU mortality for admissions with sepsis, N (%)                  | 452 (16.9%)                                | 667 (13.6%)                 | 359 (14.6%)                           | 284 (22.3%)                        | 1,762 (15.6%)  |

Abbreviations: ICNARC, Intensive Care National Audit and Research Center; ICU, intensive care unit; NHS, National Health Service
