# Supplementary material for: Descriptors of Sepsis Using the Sepsis-3 Criteria: A Cohort Study in Critical Care Units Within the U.K. National Institute for Health Research Critical Care Health Informatics Collaborative*
Source: PubMed Central journal article supplement (PMC8508729; doi:10.1097/ccm.0000000000005169), 2021-07-01
Supplement: ccm-49-1883-s005.pdf [file ccm-49-1883-s005.pdf]

## Supplemental Digital Content 5

**sTable 3**

Sensitivity analysis in which a minimum of 6 hours of norepinephrine administration is required for it to be considered in the calculation of the cardiovascular SOFA: characteristics of ICU admissions by infection status

| Infection status on admission                                          | Septic shock     | Sepsis without shock | Antibiotics without sepsis | Not on antibiotics | Overall          |
|------------------------------------------------------------------------|------------------|----------------------|----------------------------|--------------------|------------------|
| Number of admissions                                                   | 2737             | 8568                 | 5571                       | 11580              | 28456            |
| Women, n (%)                                                           | 1,044 (38.1%)    | 3,656 (42.7%)        | 2,369 (42.5%)              | 4,897 (42.3%)      | 11,966 (42.1%)   |
| Age, median (IQR)                                                      | 63.5 (49.5-74.3) | 61.3 (47-73.9)       | 63.3 (51.4-72.3)           | 63.9 (50-74.3)     | 63.1 (49.3-73.8) |
| <b>Admission category</b>                                              |                  |                      |                            |                    |                  |
| Elective surgical                                                      | 0                | 0                    | 4,498 (80.7%)              | 5,041 (43.5%)      | 9,539 (33.5%)    |
| Emergency surgical                                                     | 652 (23.8%)      | 2,038 (23.8%)        | 356 (6.4%)                 | 1,539 (13.3%)      | 4,585 (16.1%)    |
| Emergency medical                                                      | 2,085 (76.2%)    | 6,530 (76.2%)        | 717 (12.9%)                | 5,000 (43.2%)      | 14,332 (50.4%)   |
| In hospital < 48h prior                                                | 1,686 (61.6%)    | 4,503 (52.6%)        | 3,071 (55.1%)              | 6,780 (58.5%)      | 16,040 (56.4%)   |
| <b>Organ system affected on admission (ICNARC admission diagnosis)</b> |                  |                      |                            |                    |                  |
| Cardiovascular                                                         | 646 (24.0%)      | 1,009 (11.8%)        | 655 (11.9%)                | 4,170 (36.2%)      | 6,480 (22.9%)    |
| Respiratory                                                            | 748 (27.8%)      | 3,002 (35.2%)        | 846 (15.3%)                | 1,436 (12.5%)      | 6,032 (21.3%)    |
| Hematologic                                                            | 63 (2.3%)        | 250 (2.9%)           | 30 (0.5%)                  | 140 (1.2%)         | 483 (1.7%)       |
| Genito-urinary                                                         | 224 (8.3%)       | 845 (9.9%)           | 1,241 (22.5%)              | 1,332 (11.6%)      | 3,642 (12.9%)    |
| Neurologic                                                             | 198 (7.3%)       | 750 (8.8%)           | 298 (5.4%)                 | 1088 (9.4%)        | 2,334 (8.3%)     |
| Gastrointestinal                                                       | 430 (16.0%)      | 1,420 (16.7%)        | 1,729 (31.3%)              | 1,360 (11.8%)      | 4,939 (17.5%)    |
| Metabolic or poisoning                                                 | 59 (2.2%)        | 441 (5.1%)           | 156 (2.8%)                 | 1,160 (10.0%)      | 1,816 (6.4%)     |
| Trauma                                                                 | 263 (9.8%)       | 401 (4.7%)           | 64 (1.2%)                  | 556 (4.8%)         | 1,284 (4.5%)     |
| Other                                                                  | 64 (2.3%)        | 403 (4.7%)           | 507 (9.1%)                 | 277 (2.4%)         | 1,251 (4.4%)     |
| <b>First 24h physiology</b>                                            |                  |                      |                            |                    |                  |
| Maximum heart rate, median (IQR)                                       | 112 (96-128)     | 103 (90-118)         | 95 (83-107)                | 93 (82-105)        | 97 (85-112)      |
| Minimum MAP in mmHg, median (IQR)                                      | 58 (53-63)       | 63 (57-70)           | 64 (58-71)                 | 65 (59-73)         | 63 (57-71)       |
| Maximum FiO <sub>2</sub> , median (IQR)                                | 0.60 (0.41-0.95) | 0.40 (0.30-0.60)     | 0.35 (0.28-0.45)           | 0.40 (0.28-0.55)   | 0.40 (0.28-0.60) |
| Minimum SpO <sub>2</sub> , median (IQR)                                | 92 (88-94)       | 92 (89-95)           | 94 (92-95)                 | 94 (92-96)         | 93 (91-95)       |
| Minimum PaO <sub>2</sub> in mmHg, median (IQR)                         | 6.3 (4.9-9.2)    | 8.2 (5.7-10.0)       | 9.4 (5.7-11.2)             | 8.8 (5.2-10.8)     | 8.5 (5.4-10.5)   |
| Minimum P:F ratio, median (IQR)                                        | 15 (10-23)       | 22 (14-33.7)         | 32 (19.8-44)               | 26 (15-41)         | 24 (15-38)       |
| Minimum GCS, median (IQR)                                              | 6 (3-13)         | 14 (7-15)            | 14 (10-15)                 | 14 (6-15)          | 14 (6-15)        |
| Maximum creatinine in micromol/L, median (IQR)                         | 126 (81-200)     | 86 (60-147)          | 81 (62-111)                | 83 (65-117)        | 85 (64-131)      |
