# Supplementary material for: Descriptors of Sepsis Using the Sepsis-3 Criteria: A Cohort Study in Critical Care Units Within the U.K. National Institute for Health Research Critical Care Health Informatics Collaborative*
Source: PubMed Central journal article supplement (PMC8508729; doi:10.1097/ccm.0000000000005169), 2021-07-01
Supplement: ccm-49-1883-s006.pdf [file ccm-49-1883-s006.pdf]

# Supplemental Digital Content 6

## sFigure 2

Distribution of organ-specific Sequential Organ Failure Assessment (SOFA) score components by day after start of sepsis episode

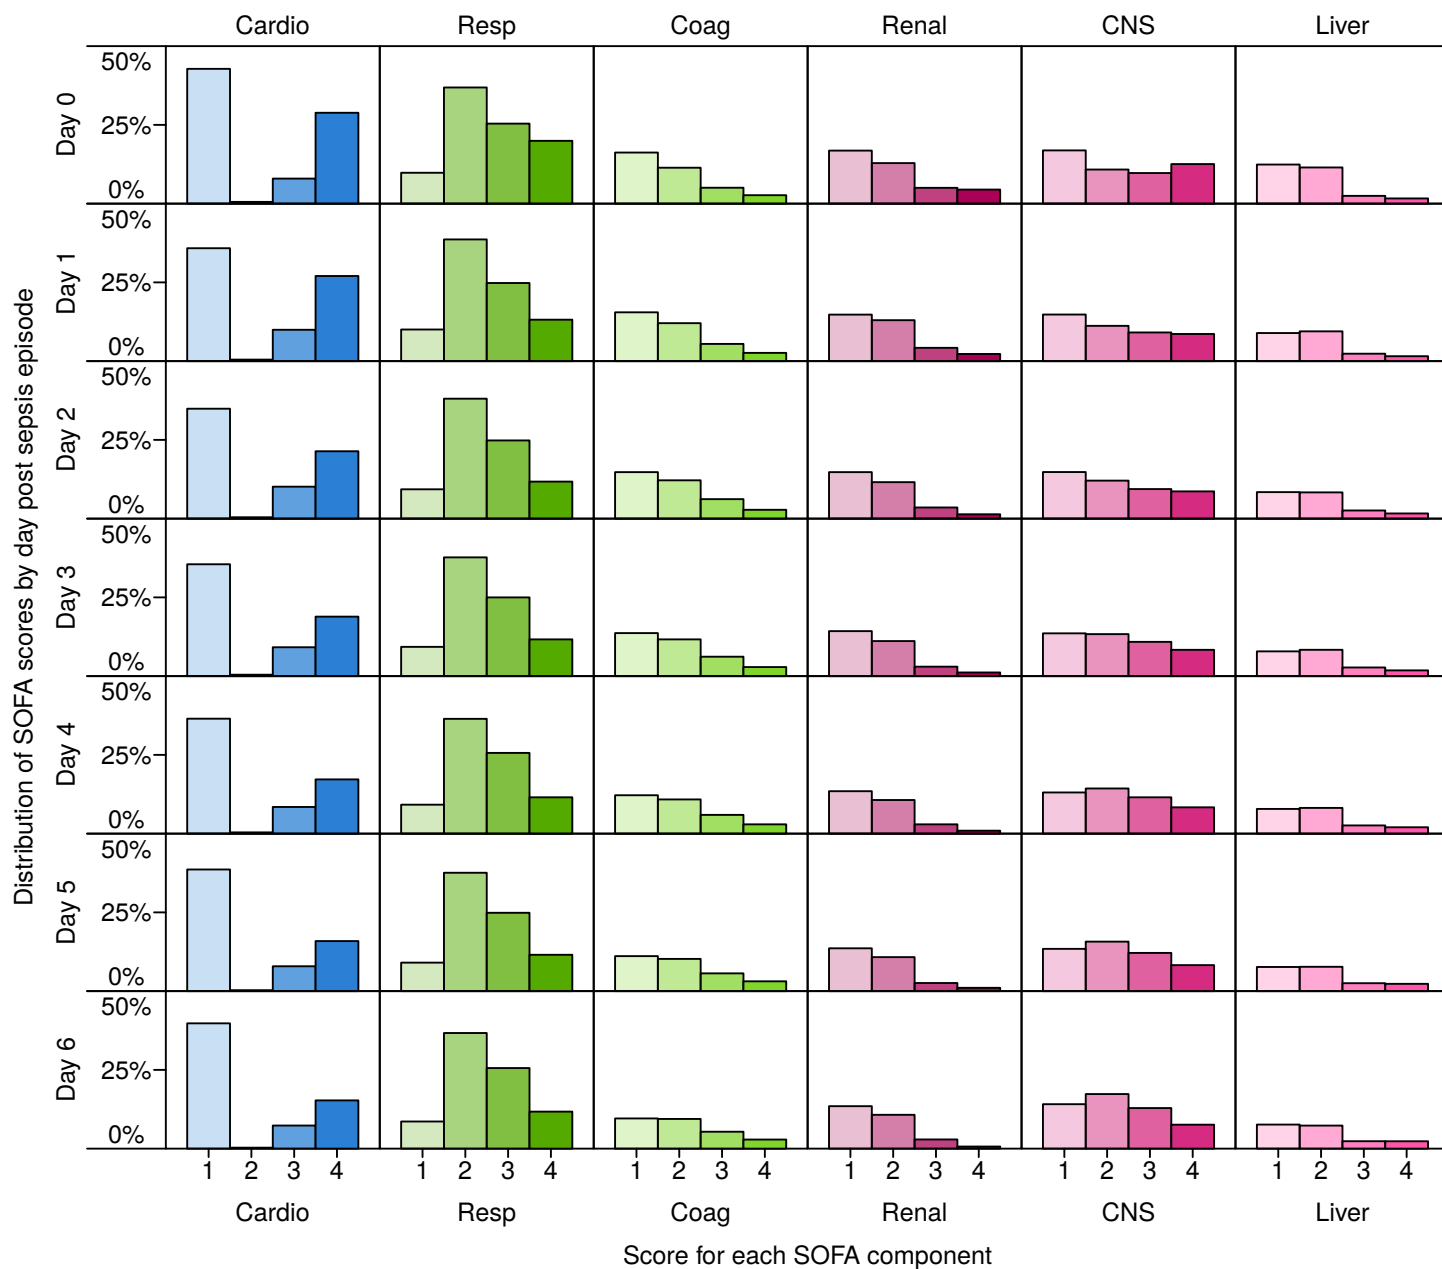

Abbreviations: CNS, central nervous system; Coag, coagulation
