# Supplementary material for: Descriptors of Sepsis Using the Sepsis-3 Criteria: A Cohort Study in Critical Care Units Within the U.K. National Institute for Health Research Critical Care Health Informatics Collaborative*
Source: PubMed Central journal article supplement (PMC8508729; doi:10.1097/ccm.0000000000005169), 2021-07-01
Supplement: ccm-49-1883-s007.pdf [file ccm-49-1883-s007.pdf]

# Supplemental Digital Content 7

## sFigure 3

Distribution of Sequential Organ Failure Assessment (SOFA) score components by day prior to discharge from intensive care unit (ICU), for patients who survive an episode of sepsis

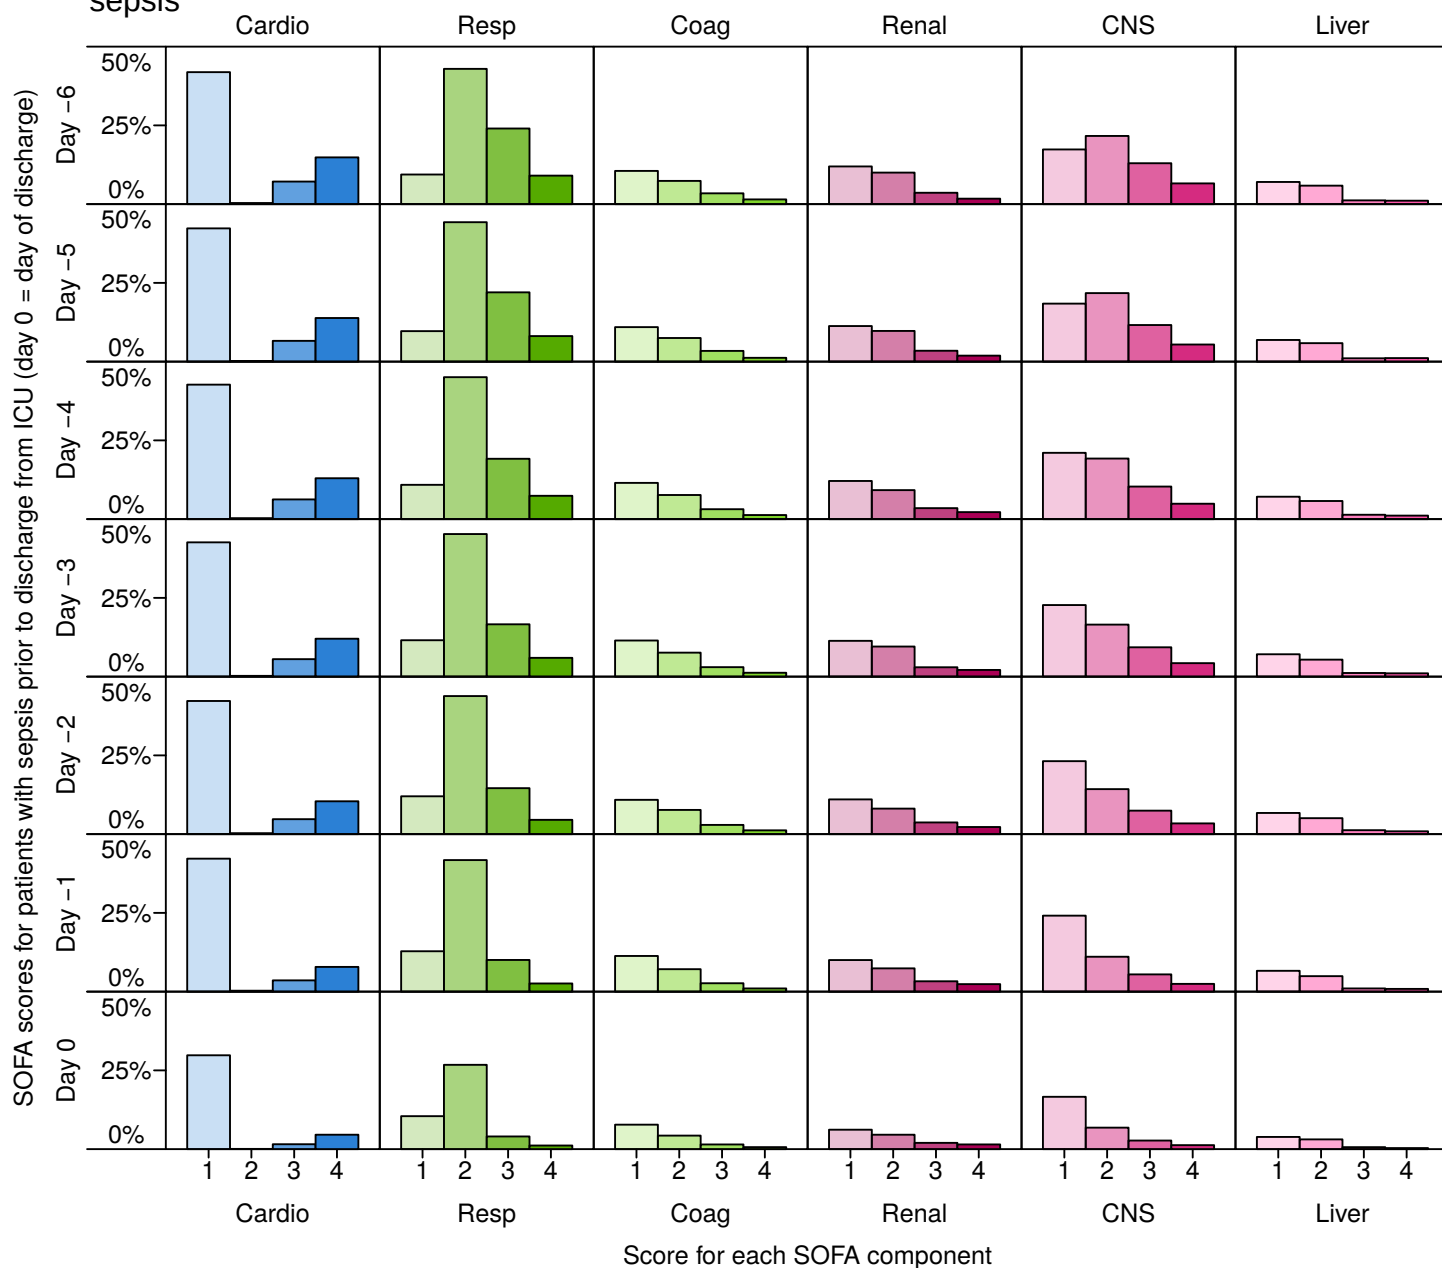

Abbreviations: CNS, central nervous system; Coag, coagulation; ICU, intensive care unit
