# Supplementary material for: Descriptors of Sepsis Using the Sepsis-3 Criteria: A Cohort Study in Critical Care Units Within the U.K. National Institute for Health Research Critical Care Health Informatics Collaborative*
Source: PubMed Central journal article supplement (PMC8508729; doi:10.1097/ccm.0000000000005169), 2021-07-01
Supplement: ccm-49-1883-s010.pdf [file ccm-49-1883-s010.pdf]

## Supplemental Digital Content 10

**sTable 4**

Characteristics and outcomes for patients with sepsis acquired in the intensive care unit, using two methods for handling glasgow coma score values recorded while the patient was receiving sedative medication

| Source of sepsis                                                                                            | Using all GCS measurements, regardless of sedation (main analysis) | Omitting GCS measurements on sedation (sensitivity analysis) | P value for comparison |
|-------------------------------------------------------------------------------------------------------------|--------------------------------------------------------------------|--------------------------------------------------------------|------------------------|
| N patients                                                                                                  | 2,040                                                              | 2,007                                                        |                        |
| Women, n (%)                                                                                                | 719 (35.2%)                                                        | 717 (35.7%)                                                  | 0.77                   |
| Age, median (IQR)                                                                                           | 61.3 (47.5-72.0)                                                   | 61.5 (48.1-72.1)                                             | 0.70                   |
| <b>Severity of sepsis, n (%)</b>                                                                            |                                                                    |                                                              |                        |
| Septic shock                                                                                                | 415 (20.3%)                                                        | 403 (20.1%)                                                  | 0.87                   |
| SOFA, median (IQR)                                                                                          | 9 (6-11)                                                           | 7 (5-10)                                                     | < 0.0001               |
| <b>Change in component SOFA score on the day that criteria for sepsis were met</b>                          |                                                                    |                                                              |                        |
| Cardiovascular, mean (SD)                                                                                   | 1.04 (1.42)                                                        | 1.07 (1.41)                                                  | 0.56                   |
| Respiratory, mean (SD)                                                                                      | 0.87 (1.10)                                                        | 0.90 (1.09)                                                  | 0.34                   |
| Renal, mean (SD)                                                                                            | 0.21 (0.62)                                                        | 0.22 (0.62)                                                  | 0.63                   |
| Coagulation, mean (SD)                                                                                      | 0.14 (0.59)                                                        | 0.15 (0.60)                                                  | 0.55                   |
| Central nervous system, mean (SD)                                                                           | 1.18 (1.44)                                                        | 0.85 (1.32)                                                  | < 0.0001               |
| Liver, mean (SD)                                                                                            | 0.17 (0.54)                                                        | 0.18 (0.55)                                                  | 0.47                   |
| <b>Relative contribution of organ system to overall delta SOFA on the day that sepsis criteria were met</b> |                                                                    |                                                              |                        |
| Cardiovascular, %                                                                                           | 26.3                                                               | 29.2                                                         | 0.03                   |
| Respiratory, %                                                                                              | 26.6                                                               | 28.9                                                         | 0.06                   |
| Renal, %                                                                                                    | 6.2                                                                | 6.4                                                          | 0.72                   |
| Coagulation, %                                                                                              | 3.6                                                                | 4.1                                                          | 0.4                    |
| Central nervous system, %                                                                                   | 32.8                                                               | 26.3                                                         | < 0.0001               |
| Liver, %                                                                                                    | 4.4                                                                | 5.1                                                          | 0.17                   |
| <b>Outcomes</b>                                                                                             |                                                                    |                                                              |                        |
| ICU length of stay in days, median (IQR)                                                                    | 18.2 (11.1-30.1)                                                   | 18.0 (10.9-30.4)                                             | 0.78                   |
| ICU mortality, n (%)                                                                                        | 484 (23.7%)                                                        | 464 (23.1%)                                                  | 0.68                   |
| ICU mortality for septic shock, n (%)                                                                       | 170 (41.0%)                                                        | 154 (38.2%)                                                  | 0.46                   |

Abbreviations: GCS, glasgow coma score; IQR, interquartile range; ICNARC, Intensive Care National Audit and Research Center; SD, standard deviation; SOFA, Sequential Organ Failure Score

Data are shown for the first episode of ICU-acquired sepsis per admission.

P values are from Wilcoxon tests (where median and IQR are quoted), t tests (where mean and SD are quoted) or proportion tests.
