# Supplementary material for: Descriptors of Sepsis Using the Sepsis-3 Criteria: A Cohort Study in Critical Care Units Within the U.K. National Institute for Health Research Critical Care Health Informatics Collaborative*
Source: PubMed Central journal article supplement (PMC8508729; doi:10.1097/ccm.0000000000005169), 2021-07-01
Supplement: ccm-49-1883-s011.pdf [file ccm-49-1883-s011.pdf]

## Supplemental Digital Content 11

### sTable 5

Survival models by sepsis status on admission for emergency admissions to intensive care units, showing subdistribution hazards from a Fine and Gray (competing risks) model and cause-specific hazards from a Cox model.

| Sepsis status on admission<br>(compared to no sepsis) | Mortality hazard ratio (95% CI) |                   | Discharge hazard ratio (95% CI) |                   |
|-------------------------------------------------------|---------------------------------|-------------------|---------------------------------|-------------------|
|                                                       | Subdistribution                 | Cause-specific    | Subdistribution                 | Cause-specific    |
| Sepsis without shock                                  | 0.80 (0.72, 0.88)               | 0.80 (0.72, 0.88) | 0.72 (0.69, 0.74)               | 0.72 (0.69, 0.74) |
| Septic shock                                          | 1.58 (1.42, 1.75)               | 1.58 (1.43, 1.74) | 0.38 (0.36, 0.40)               | 0.38 (0.36, 0.40) |

Death and discharge alive were modeled as competing outcomes; there was no censoring. Models were adjusted for age, sex, age/sex interaction and admission category (medical or surgical).
