# Supplementary material for: Descriptors of Sepsis Using the Sepsis-3 Criteria: A Cohort Study in Critical Care Units Within the U.K. National Institute for Health Research Critical Care Health Informatics Collaborative*
Source: PubMed Central journal article supplement (PMC8508729; doi:10.1097/ccm.0000000000005169), 2021-07-01
Supplement: ccm-49-1883-s012.pdf [file ccm-49-1883-s012.pdf]

## Supplemental Digital Content 12

**sTable 6**

Antibiotic use in intensive care units, by rank

| Antibiotic                | Total number of days | Total number of courses | Percentage of all courses |
|---------------------------|----------------------|-------------------------|---------------------------|
| <b>Rank 4</b>             |                      |                         |                           |
| Meropenem                 | 26,304               | 4,716                   | 7.5                       |
| Amikacin                  | 3,876                | 1,351                   | 2.1                       |
| Linezolid                 | 3,976                | 716                     | 1.1                       |
| Tigecycline               | 932                  | 110                     | 0.2                       |
| Colistin                  | 857                  | 106                     | 0.2                       |
| <b>Rank 3</b>             |                      |                         |                           |
| Gentamicin                | 15,889               | 7,200                   | 11.4                      |
| Piperacillin / tazobactam | 28,578               | 6,317                   | 10.0                      |
| Vancomycin                | 14,278               | 3,679                   | 5.8                       |
| Teicoplanin               | 6,167                | 1,969                   | 3.1                       |
| Ceftazidime               | 4,040                | 915                     | 1.4                       |
| Ertapenem                 | 123                  | 35                      | 0.1                       |
| <b>Rank 2</b>             |                      |                         |                           |
| Co-amoxiclav              | 30,603               | 10,988                  | 17.4                      |
| Cefuroxime                | 7,856                | 3,759                   | 6.0                       |
| Ciprofloxacin             | 10,882               | 2,584                   | 4.1                       |
| Clarithromycin            | 7,817                | 2,550                   | 4.0                       |
| Ceftriaxone               | 3,973                | 1,241                   | 2.0                       |
| Erythromycin              | 2,744                | 865                     | 1.4                       |
| Clindamycin               | 2,841                | 717                     | 1.1                       |
| Chloramphenicol           | 2,120                | 422                     | 0.7                       |
| Levofloxacin              | 1,068                | 256                     | 0.4                       |
| Azithromycin              | 826                  | 250                     | 0.4                       |
| Moxifloxacin              | 512                  | 55                      | 0.1                       |
| Cefotaxime                | 55                   | 21                      | 0.0                       |
| Ofloxacin                 | 14                   | 5                       | 0.0                       |
| <b>Rank 1</b>             |                      |                         |                           |
| Metronidazole             | 20,847               | 6,423                   | 10.2                      |
| Co-trimoxazole            | 8,108                | 1,763                   | 2.8                       |
| Flucloxacillin            | 3,397                | 1,128                   | 1.8                       |
| Doxycycline               | 2,751                | 1,031                   | 1.6                       |
| Amoxicillin               | 2,121                | 602                     | 1.0                       |
| Phenoxymethylpenicillin   | 1,370                | 311                     | 0.5                       |

*Descriptors of sepsis using the Sepsis-3 criteria: a cohort study in critical care units within the UK NIHR Critical Care Health Informatics Collaborative*

| <b>Antibiotic</b>                     | <b>Total number of days</b> | <b>Total number of courses</b> | <b>Percentage of all courses</b> |
|---------------------------------------|-----------------------------|--------------------------------|----------------------------------|
| Benzylpenicillin                      | 1,359                       | 300                            | 0.5                              |
| Rifampacin                            | 1,730                       | 222                            | 0.4                              |
| Isoniazid                             | 1,317                       | 209                            | 0.3                              |
| Pyrazinamide                          | 623                         | 72                             | 0.1                              |
| Trimethoprim                          | 171                         | 67                             | 0.1                              |
| Ethambutal HCL                        | 412                         | 61                             | 0.1                              |
| Nitrofurantion                        | 84                          | 35                             | 0.1                              |
| Rifampicin / isoniazid                | 61                          | 18                             | 0.0                              |
| Fusidic acid                          | 57                          | 15                             | 0.0                              |
| Rifampicin / isoniazid / pyrazinamide | 59                          | 11                             | 0.0                              |
| Tobramycin                            | 51                          | 8                              | 0.0                              |
| Pentamidine                           | 17                          | 7                              | 0.0                              |
