# Supplementary material for: Descriptors of Sepsis Using the Sepsis-3 Criteria: A Cohort Study in Critical Care Units Within the U.K. National Institute for Health Research Critical Care Health Informatics Collaborative*
Source: PubMed Central journal article supplement (PMC8508729; doi:10.1097/ccm.0000000000005169), 2021-07-01

# Supplemental Digital Content 14

## sFigure 7

Relative antibiotic use over calendar time in intensive care units

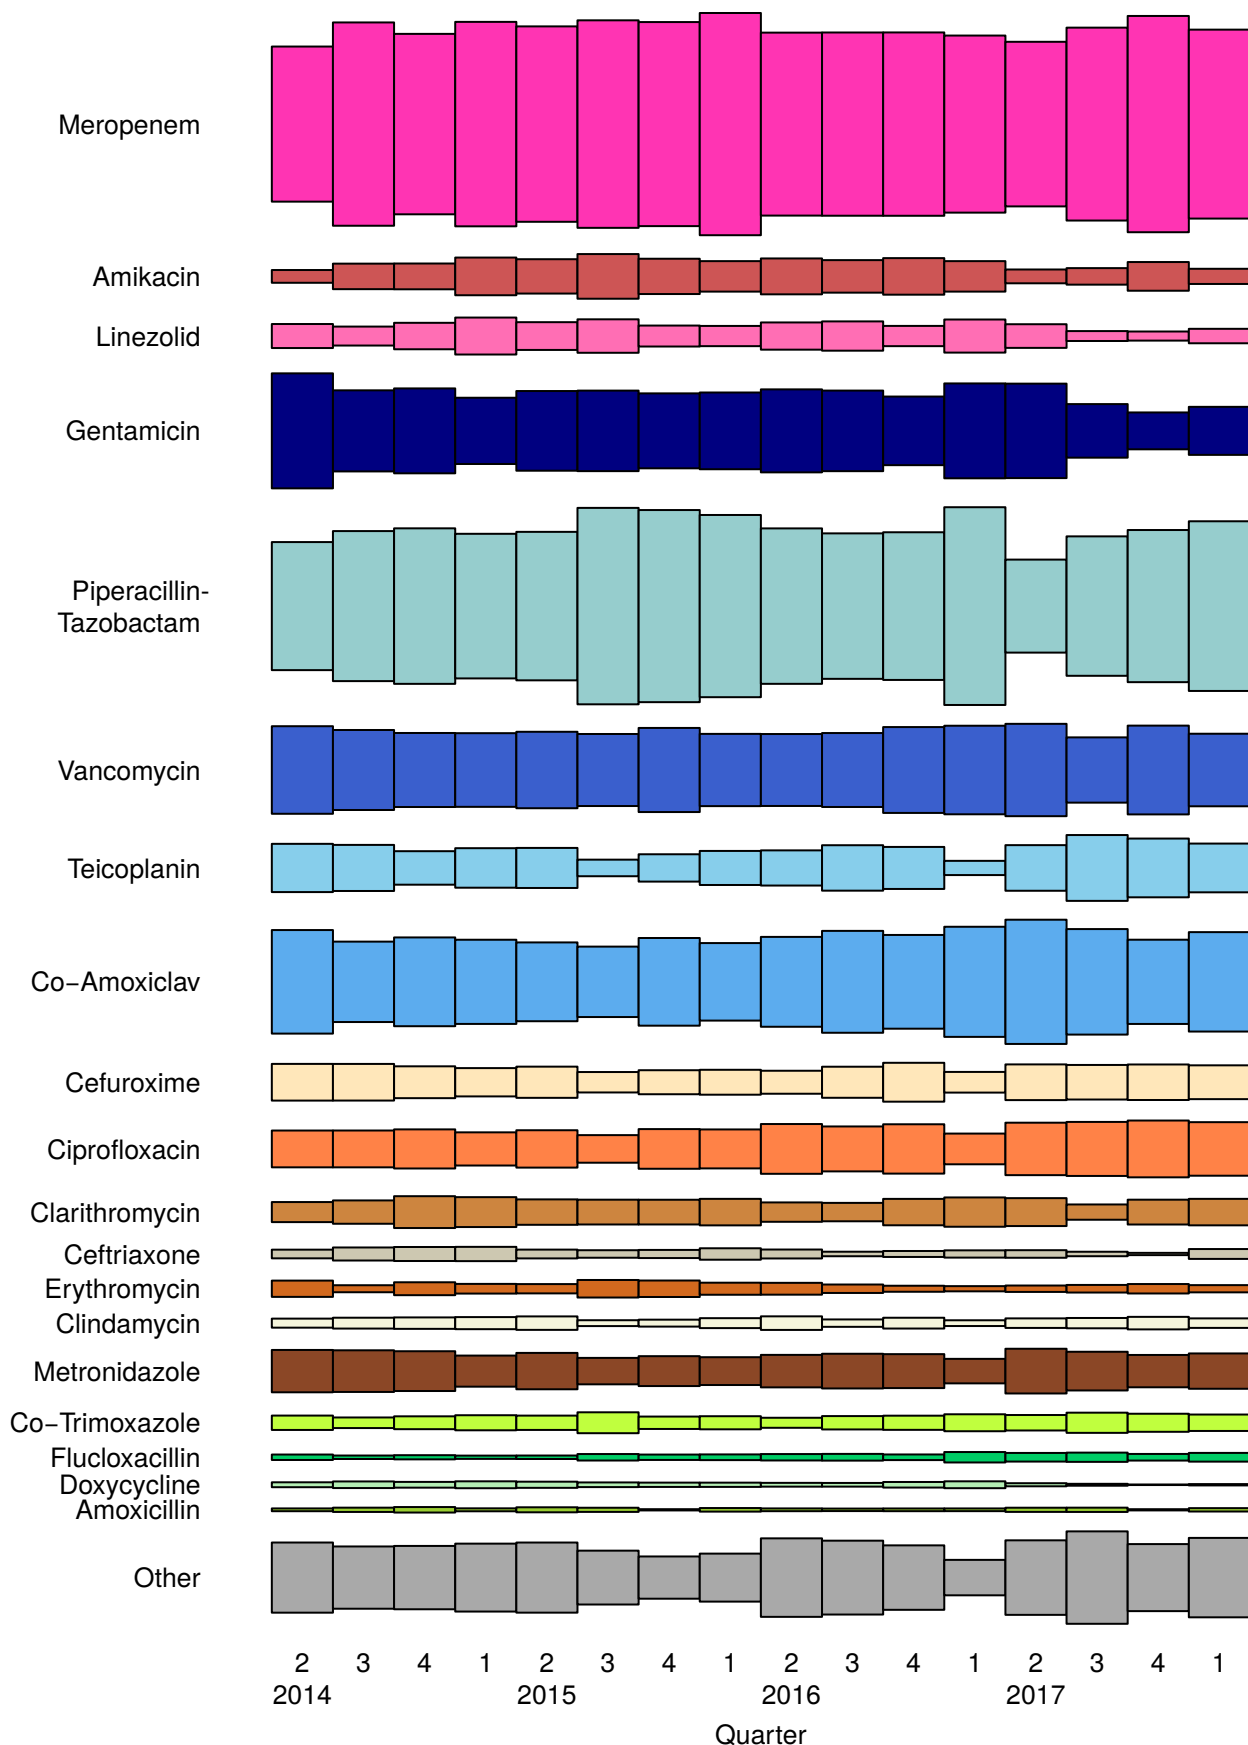

Supplement: ccm-49-1883-s014.pdf [file ccm-49-1883-s014.pdf]
