# Supplementary material for: Descriptors of Sepsis Using the Sepsis-3 Criteria: A Cohort Study in Critical Care Units Within the U.K. National Institute for Health Research Critical Care Health Informatics Collaborative*
Source: Crit Care Med. 2021 Jul 1;49(11):1883–94. doi: 10.1097/CCM.0000000000005169 (PMC8508729; doi:10.1097/CCM.0000000000005169)
Supplement: Supplementary file 4 [file ccm-49-1883-s004.pdf]

## Supplemental Digital Content 4

**sTable 2**

Characteristics of patients admitted to intensive care units with sepsis (as per sepsis-3 criteria) according to duration of intravenous antibiotic administration

| Duration of intravenous antibiotics                                    | Antibiotics for at least 4 days or until death | Discharged alive from ICU after < 4 days; total duration of antibiotics unknown | Antibiotics for < 4 days | Overall (all patients with sepsis on admission to ICU) |
|------------------------------------------------------------------------|------------------------------------------------|---------------------------------------------------------------------------------|--------------------------|--------------------------------------------------------|
| Number of admissions                                                   | 5,553                                          | 3,184                                                                           | 2,581                    | 11,318                                                 |
| Women, n (%)                                                           | 2,120 (38.2%)                                  | 1,408 (44.2%)                                                                   | 1,176 (45.6%)            | 4,704 (41.6%)                                          |
| Age, median (IQR)                                                      | 62.3 (48.4-73.8)                               | 60.0 (45.0-73.5)                                                                | 63.8 (48.8-75.5)         | 61.9 (47.6-74.0)                                       |
| <b>Admission category</b>                                              |                                                |                                                                                 |                          |                                                        |
| Emergency surgical                                                     | 859 (15.5%)                                    | 1,039 (32.6%)                                                                   | 796 (30.8%)              | 2,649 (23.8%)                                          |
| Emergency medical                                                      | 4,694 (84.5%)                                  | 2,145 (67.4%)                                                                   | 1,785 (69.2%)            | 8,624 (76.2%)                                          |
| In hospital < 48h prior                                                | 2,917 (52.5%)                                  | 1,706 (53.6%)                                                                   | 1,573 (60.9%)            | 6,196 (54.7%)                                          |
| Septic shock on admission, n (%)                                       | 2,318 (41.7%)                                  | 575 (22.3%)                                                                     | 460 (14.4%)              | 3,353 (29.6%)                                          |
| <b>Organ system affected on admission (ICNARC admission diagnosis)</b> |                                                |                                                                                 |                          |                                                        |
| Cardiovascular                                                         | 877 (16.0%)                                    | 398 (12.6%)                                                                     | 380 (14.8%)              | 1,655 (14.7%)                                          |
| Respiratory                                                            | 2,229 (40.6%)                                  | 866 (27.3%)                                                                     | 657 (25.6%)              | 3,752 (33.4%)                                          |
| Hematologic                                                            | 154 (2.8%)                                     | 99 (3.1%)                                                                       | 60 (2.3%)                | 313 (2.8%)                                             |
| Genito-urinary                                                         | 405 (7.4%)                                     | 426 (13.4%)                                                                     | 238 (9.3%)               | 1,069 (9.5%)                                           |
| Neurologic                                                             | 387 (7.0%)                                     | 199 (6.3%)                                                                      | 362 (14.1%)              | 948 (8.4%)                                             |
| Gastrointestinal                                                       | 797 (14.5%)                                    | 630 (19.9%)                                                                     | 426 (16.6%)              | 1,853 (16.5%)                                          |
| Metabolic or poisoning                                                 | 150 (2.7%)                                     | 202 (6.3%)                                                                      | 148 (5.7%)               | 500 (4.4%)                                             |
| Trauma                                                                 | 370 (6.7%)                                     | 165 (5.2%)                                                                      | 136 (5.3%)               | 671 (6.0%)                                             |
| Other                                                                  | 59 (1.1%)                                      | 16 (0.5%)                                                                       | 14 (0.5%)                | 89 (0.8%)                                              |
| <b>First 24h physiology</b>                                            |                                                |                                                                                 |                          |                                                        |
| Maximum heart rate, median (IQR)                                       | 110 (94-126)                                   | 102 (89-116)                                                                    | 100 (87-115)             | 105 (91-121)                                           |
| Minimum MAP in mmHg, median (IQR)                                      | 61 (55-67)                                     | 63 (57-71)                                                                      | 63 (56-70)               | 62 (56-69)                                             |
| Maximum FiO2, median (IQR)                                             | 0.60 (0.40-0.85)                               | 0.36 (0.28-0.50)                                                                | 0.40 (0.30-0.60)         | 0.50 (0.35-0.70)                                       |
| Minimum SpO2, median (IQR)                                             | 91 (88-94)                                     | 93 (90-95)                                                                      | 93 (90-95)               | 92 (89-95)                                             |
| Minimum PaO2 in mmHg, median (IQR)                                     | 7.4 (5.3-9.4)                                  | 8.4 (5.6-10.2)                                                                  | 8.5 (5.7-10.1)           | 7.9 (5.4-9.8)                                          |
| Minimum P:F ratio, median (IQR)                                        | 16 (11-24)                                     | 26 (17-38)                                                                      | 24 (15-36)               | 20 (13-32)                                             |
| Minimum GCS, median (IQR)                                              | 9 (3-14)                                       | 14 (10-15)                                                                      | 13 (7-15)                | 12 (5-15)                                              |
| Maximum creatinine in micromol/L, median (IQR)                         | 107 (68-193)                                   | 81 (59-128)                                                                     | 88 (63-148)              | 93 (64-166)                                            |
| Minimum platelets, median (IQR)                                        | 174 (102-257)                                  | 189 (132-265)                                                                   | 189 (132-252)            | 182 (1118-258)                                         |

| Duration of intravenous antibiotics           | Antibiotics for at least 4 days or until death | Discharged alive from ICU after < 4 days; total duration of antibiotics unknown | Antibiotics for < 4 days | Overall (all patients with sepsis on admission to ICU) |
|-----------------------------------------------|------------------------------------------------|---------------------------------------------------------------------------------|--------------------------|--------------------------------------------------------|
| Maximum bilirubin in micromol/L, median (IQR) | 14 (8-27)                                      | 11 (7-20)                                                                       | 11 (7-20)                | 12 (7-23)                                              |
| Use of any vasopressors, n (%)                | 3,345 (60.2%)                                  | 828 (26.0%)                                                                     | 940 (36.4%)              | 5,112 (45.2%)                                          |
| SOFA score, median (IQR)                      | 10 (7-12)                                      | 5 (3-8)                                                                         | 7 (4-10)                 | 8 (5-11)                                               |
| <b>Outcomes</b>                               |                                                |                                                                                 |                          |                                                        |
| ICU length of stay in days, median (IQR)      | 8.7 (5.2-16.5)                                 | 1.8 (0.9-2.8)                                                                   | 3.1 (2.0-5.7)            | 4.2 (2.0-9.8)                                          |
| ICU mortality, n (%)                          | 1,498 (27.0%)                                  | 0                                                                               | 264 (10.2%)              | 1,762 (15.6%)                                          |

Abbreviations: GCS, Glasgow Coma Score, ICU, intensive care unit; IQR, interquartile range; ICNARC, Intensive Care National Audit and Research Center; MAP, mean arterial pressure; SOFA, Sequential Organ Failure Score
